# Supplementary material for: Relative Humidity Optical Sensor Based on Self-Assembled Gold Nanoparticles Covered with Nafion
Source: MDPI journal article supplement (doi:10.3390/photonics10090975), 2023-08-25
Supplement: s1 [file s1]

Archive with 1 entries (1 files):
- photonics-2502716-supplementary.pdf
